# Supplementary material
Source: publisher figshare collection journal article supplement (https://osapublishing.figshare.com/ndownloader/files/31075894)
Supplement: Supplementary file 1 [file 31075894]

## Visually guided chick ocular length and structural thickness variations assessed by swept-source optical coherence tomography: supplement

**FENG YAN,<sup>1,3</sup> CHEN WANG,<sup>1,3</sup> JAYLA A. WILSON,<sup>1</sup> MICHAEL O'CONNELL,<sup>1</sup> SAM TON,<sup>1</sup> NOAH DAVIDSON,<sup>1</sup> MOURREN SIBICHAN,<sup>1</sup> KARI CHAMBERS,<sup>1</sup> AHMED AHMED,<sup>1</sup> JODY SUMMERS,<sup>2,4</sup> AND QINGGONG TANG<sup>1,5</sup>**

<sup>1</sup>Stephenson School of Biomedical Engineering, University of Oklahoma, Norman, OK 73072, USA

<sup>2</sup>Department of cell Biology, The University of Oklahoma Health Sciences Center, Oklahoma City. OK 73126, USA

<sup>3</sup>Equal contribution

<sup>4</sup>jody-summers@ouhsc.edu

<sup>5</sup>qtang@ou.edu

---

This supplement published with Optica Publishing Group on 13 October 2021 by The Authors under the terms of the [Creative Commons Attribution 4.0 License](https://creativecommons.org/licenses/by/4.0/) in the format provided by the authors and unedited. Further distribution of this work must maintain attribution to the author(s) and the published article's title, journal citation, and DOI.

Supplement DOI: <https://doi.org/10.6084/m9.figshare.16751932>

Parent Article DOI: <https://doi.org/10.1364/BOE.433333>

## Supplement document

Visually Guided Chick Ocular Length and Structural Thickness  
Variations Assessed by Swept-Source Optical Coherence Tomography

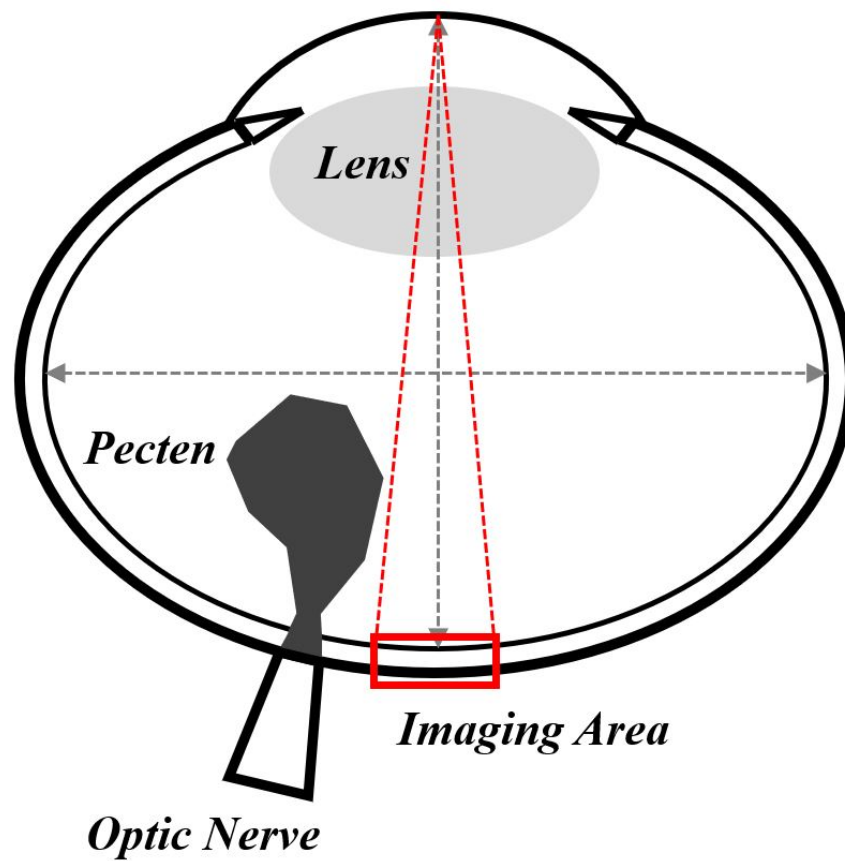

Fig. S1. Schematic of SS-OCT imaging position within the chick eye.

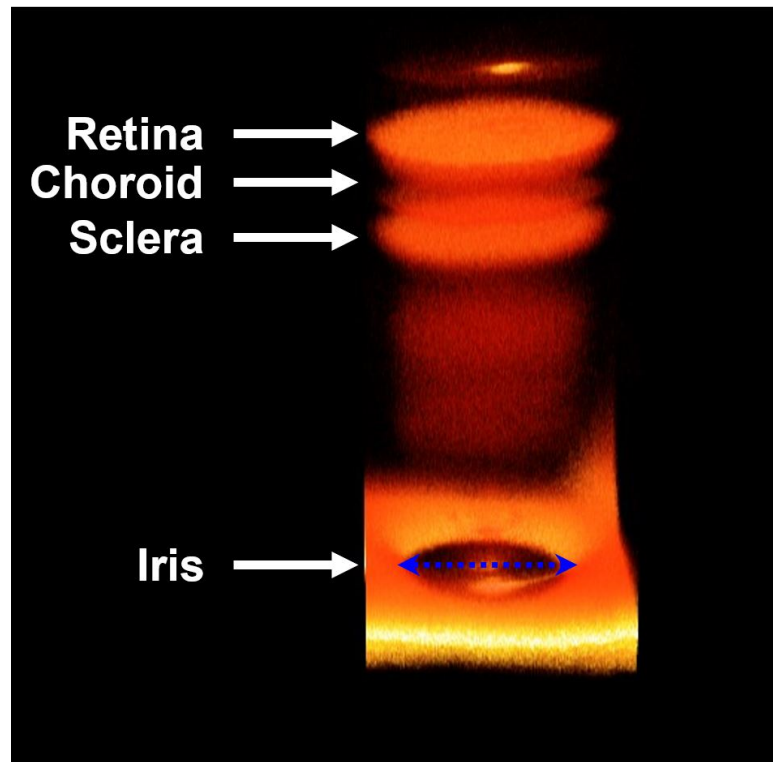

Fig. S2. 3D OCT image of the chick eye.

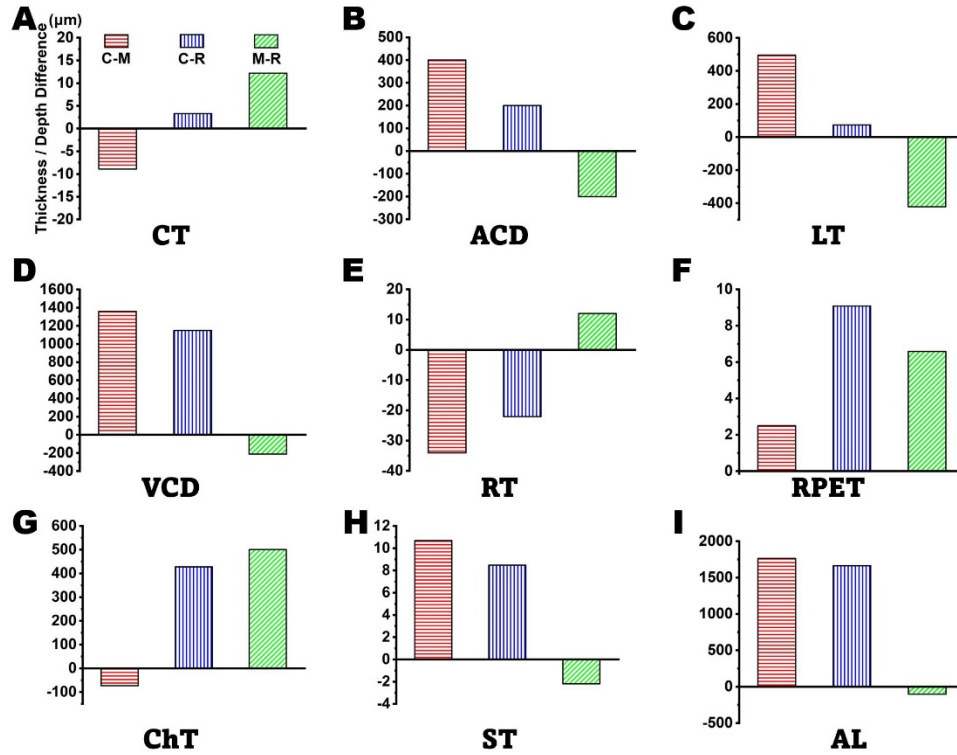

Fig. S3. Data analysis of the thickness or depth difference for CT, ACD, LT, VCD, RT, RPET, ChT, ST, and AL in control, myopic, and recovered chick eyes. (A)-(I) Difference of CT, ACD, LT, VCD, RT, RPET, ChT, ST and AL between right eyes in normal, myopic, and recovered chick eyes. N = 3. C-M, Control *versus* Myopic eyes (ocular structure thickness in Myopic subtract that of in Control). C-R, Control *versus* Recovered eyes (ocular structure thickness in Recovered subtract that of in Control). M-R, Myopic *versus* Recovered eyes (ocular structure thickness in Recovered subtract that of in Myopic).
